# Supplementary material for: Pharmacokinetic Evaluation of Tacrolimus in Chinese Adult Patients during the Early Stages Post-Lung Transplantation
Source: MDPI journal article supplement (doi:10.3390/jpm13040656), 2023-04-11
Supplement: s1 [file s1]

**Table S1** PCR primer sequences used to distinguish between the CYP3A5\*3 and CYP3A4\*1G genotypes.

| Gene                     | Primer                                                                               |
|--------------------------|--------------------------------------------------------------------------------------|
| CYP3A5*3<br>(rs776746)   | Forward: 5' TAATCCATACCCCTAGTTGTACGAC 3'<br>Reverse: 5' TACCTGCCTTCAATTTTTCCTG 3'    |
| CYP3A4*1G<br>(rs2242480) | Forward: 5' CTTTTCAGAGCCTTCCTACATAGAG 3'<br>Reverse: 5' GATGCCCTACATTGATCTGATTTAC 3' |

**Table S2** Pharmacokinetic parameters of tacrolimus stratified by CYP3A4 genotype .

| Parameter                        | All (CV%)<br>n=14    | CYP3A4*1/*1 (CV%)<br>n=9 | Non-CYP3A4*1/*1(CV%)<br>n=5 |
|----------------------------------|----------------------|--------------------------|-----------------------------|
| C <sub>max</sub> (ng/mL)         | 14.55±1.87 (69.08)   | 17.84±1.68 (55.77)       | 10.08±1.98 (76.94)          |
| C <sub>max</sub> /D(ng/mL)       | 12.70±2.29 (99.66)   | 17.06±2.29 (99.58)       | 7.46 ± 1.75 (60.85)         |
| C <sub>min</sub> (ng/mL)         | 5.58±2.34 (103.17)   | 7.82±2.15 (88.96)        | 3.03 ± 1.98 (77.34)*        |
| C <sub>min</sub> /D(ng/mL)       | 4.87±2.94 (148.55)   | 7.48±2.88 (143.94)       | 2.25 ± 1.85 (67.96)*        |
| T <sub>max</sub> (h)             | 2.00 (0.50-6.00)     | 2.00 (0.50-6.00)         | 2.00 (1.00-4.00)            |
| CL/F(L/h)                        | 9.95±2.60 (121.94)   | 6.97±2.55 (118.70)       | 18.85 ± 1.89 (70.97)        |
| AUC <sub>0-12h</sub> (ng·h/mL)   | 115.23±2.03 (80.50)  | 150.02±1.89 (70.72)      | 71.67 ± 1.84 (67.36)        |
| AUC <sub>0-12h</sub> /D(ng·h/mL) | 100.54±2.60 (121.94) | 143.41±2.55 (118.70)     | 53.05 ± 1.89 (70.97)        |

Values are expressed as the geometric mean ± geometric standard deviation or median (minimum-maximum). CV%: geometric coefficient of variation; C<sub>max</sub>: maximum concentration; C<sub>max</sub>/D: C<sub>max</sub> of dose normalised to 1mg; C<sub>min</sub>: minimum concentration; C<sub>min</sub>/D: C<sub>min</sub> of dose normalised to 1mg; T<sub>max</sub>: time at which C<sub>max</sub> occurred; CL/F: apparent clearance; AUC<sub>0-12h</sub>: AUC within 12-hour dosing interval; AUC<sub>0-12h</sub>/D: AUC<sub>0-12h</sub> of dose normalised to 1mg.

\*p ≤ 0.05 (ANOVA) Non- CYP3A4\*1/\*1 carriers versus CYP3A4\*1/\*1 carriers
